# Supplementary material
Source: publisher site journal article supplement (https://natureconservation.pensoft.net/article/76036/download/suppl/31/)
Supplement: Supplementary file 1

**Questionnaires used to collect data on snow leopard poaching and trade in Pakistan**

**A) Community surveys**

| S# | Species | Month & year | Valley | District | Animal age | Animal sex | Intention | Description | Ever apprehended<br>Yes/No | Value      |           | Potential markets | Evidence<br>body parts/ pelt/<br>carcass/ <b>photo</b> |
|----|---------|--------------|--------|----------|------------|------------|-----------|-------------|----------------------------|------------|-----------|-------------------|--------------------------------------------------------|
|    |         |              |        |          |            |            |           |             |                            | Base price | End price |                   |                                                        |
|    |         |              |        |          |            |            |           |             |                            |            |           |                   |                                                        |
|    |         |              |        |          |            |            |           |             |                            |            |           |                   |                                                        |
|    |         |              |        |          |            |            |           |             |                            |            |           |                   |                                                        |
|    |         |              |        |          |            |            |           |             |                            |            |           |                   |                                                        |
|    |         |              |        |          |            |            |           |             |                            |            |           |                   |                                                        |
|    |         |              |        |          |            |            |           |             |                            |            |           |                   |                                                        |
|    |         |              |        |          |            |            |           |             |                            |            |           |                   |                                                        |
|    |         |              |        |          |            |            |           |             |                            |            |           |                   |                                                        |
|    |         |              |        |          |            |            |           |             |                            |            |           |                   |                                                        |
|    |         |              |        |          |            |            |           |             |                            |            |           |                   |                                                        |

**Keys:**  
**Intension:** Self Defence=SD, Livestock Defence=LD, Meat=MT, Ornamental Use=OU, Trade/Smuggling=TS, other (Explain)  
**Description of offense:** SH= Shoot, Po= Poison SN= Snared, LC= Live captured, Other (Explain)  
**Market where sold:** Mention local, national and international market (city).  
**Evidence:** Please link photo with observation. E.g., Sr# 1, Nagar → Photo\_Nagar\_01



**C) Market surveys**

| S# | Species | Month & year | Animal age | Animal sex | Market/city name | Origin (from where) | Frequency of receiving specimens | Description shoot/ poisoned/ snared / live capture | Price      |           | Further market links | Evidence (photo) | Remarks (write overleaf, if required) |
|----|---------|--------------|------------|------------|------------------|---------------------|----------------------------------|----------------------------------------------------|------------|-----------|----------------------|------------------|---------------------------------------|
|    |         |              |            |            |                  |                     |                                  |                                                    | Base price | End price |                      |                  |                                       |
|    |         |              |            |            |                  |                     |                                  |                                                    |            |           |                      |                  |                                       |
|    |         |              |            |            |                  |                     |                                  |                                                    |            |           |                      |                  |                                       |
|    |         |              |            |            |                  |                     |                                  |                                                    |            |           |                      |                  |                                       |
|    |         |              |            |            |                  |                     |                                  |                                                    |            |           |                      |                  |                                       |
|    |         |              |            |            |                  |                     |                                  |                                                    |            |           |                      |                  |                                       |
|    |         |              |            |            |                  |                     |                                  |                                                    |            |           |                      |                  |                                       |
|    |         |              |            |            |                  |                     |                                  |                                                    |            |           |                      |                  |                                       |
|    |         |              |            |            |                  |                     |                                  |                                                    |            |           |                      |                  |                                       |
|    |         |              |            |            |                  |                     |                                  |                                                    |            |           |                      |                  |                                       |
|    |         |              |            |            |                  |                     |                                  |                                                    |            |           |                      |                  |                                       |
|    |         |              |            |            |                  |                     |                                  |                                                    |            |           |                      |                  |                                       |
|    |         |              |            |            |                  |                     |                                  |                                                    |            |           |                      |                  |                                       |
|    |         |              |            |            |                  |                     |                                  |                                                    |            |           |                      |                  |                                       |
|    |         |              |            |            |                  |                     |                                  |                                                    |            |           |                      |                  |                                       |
|    |         |              |            |            |                  |                     |                                  |                                                    |            |           |                      |                  |                                       |
|    |         |              |            |            |                  |                     |                                  |                                                    |            |           |                      |                  |                                       |
|    |         |              |            |            |                  |                     |                                  |                                                    |            |           |                      |                  |                                       |
|    |         |              |            |            |                  |                     |                                  |                                                    |            |           |                      |                  |                                       |

**Description:**

- 1. Month and Year:** When did the specimen was received?
- 2. Origin:** From where? E.g., Naltar valley of Gilgit
- 3. Base price:** How much did the marketmen pay for specimen?
- 4. End price:** Current price of the specimen.
- 5. Further market links:** where the specimen goes from here (city, country)
